# Supplementary material
Source: PubMed Central journal article supplement (PMC3426200)
Supplement: NIHMS394800-supplement-1.pdf [file NIHMS394800-supplement-1.pdf]

# Suppl Fig 1

## A

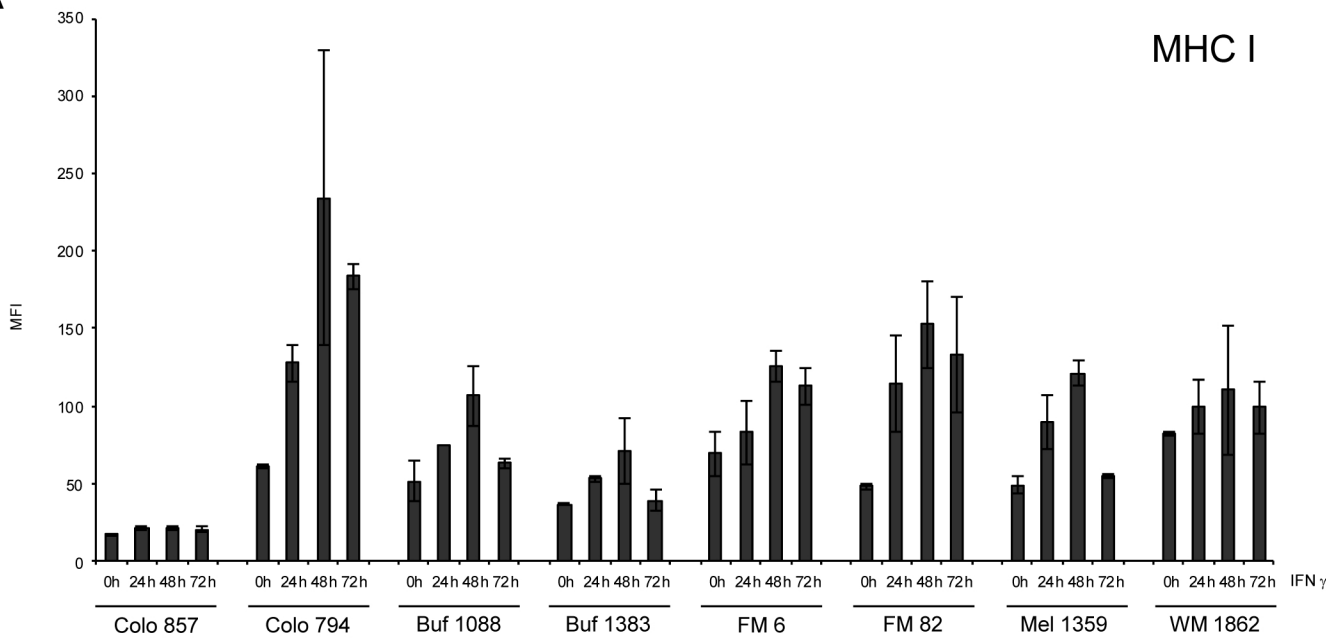

## B

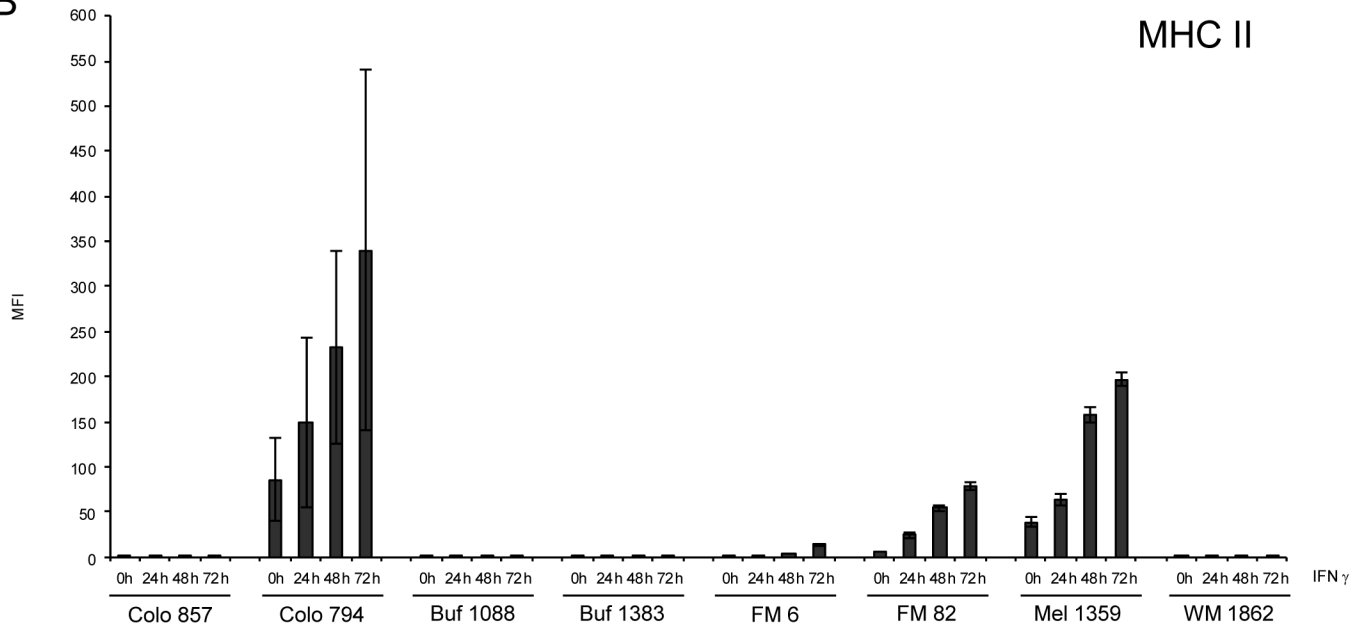

# Suppl Fig 2

## A

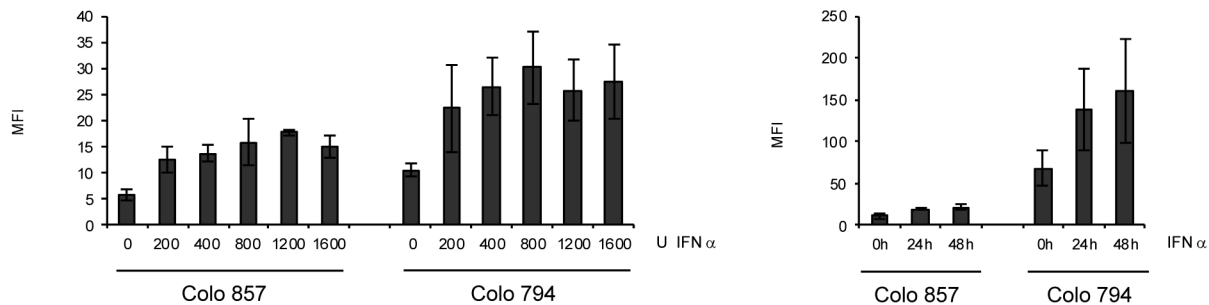

## B

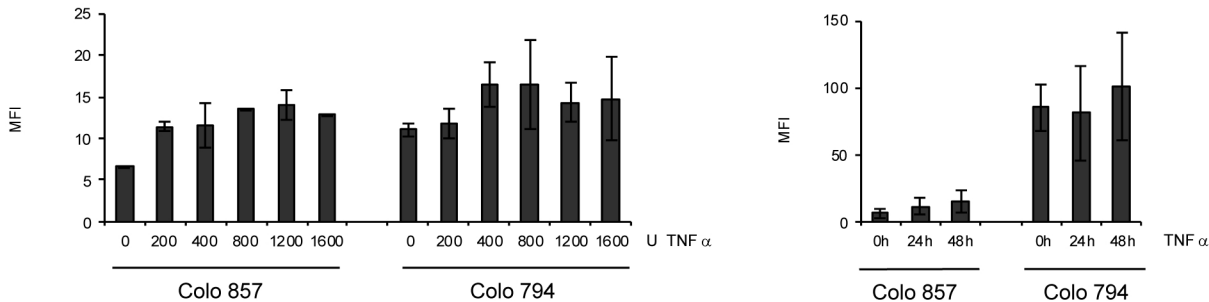

**Supplementary Figure S1:** Constitutive and cytokine-mediated regulation of HLA class I and class II surface expression in different melanoma cell lines. **(A)** Constitutive and IFN- $\gamma$ -mediated time-dependent upregulation of HLA class I antigen surface expression. The experiments were performed as described in Figure 1 using flow cytometry and an anti-HLA class I-specific mAb. **(B)** Constitutive and IFN- $\gamma$ -mediated time-dependent upregulation of HLA class II antigen surface expression. The experiments were performed as described in Figure 1 using flow cytometry and an anti-HLA class I-specific mAb.

**Supplementary Figure S2:** Dose- and time-dependent upregulation of HLA class I molecules after treatment of Colo 857 and Colo 794 with **(A)** IFN  $\alpha$  and **(B)** TNF  $\alpha$ . HLA class I antigen surface expression was analyzed by flow cytometry. Results are presented as mean of three independent experiments.
